# Supplementary material for: A Highly Conductive and Deformable Hydrogel for Chronically Stable Neural Interfaces
Source: Research Square preprint supplement (doi:10.21203/rs.3.rs-5601878/v1), 2025-06-11
Supplement: Supplementary file 1 [file bb6a253f878e2d3e6b06b9e5.docx]

# Supplementary Information:

**A Highly Conductive and Deformable Hydrogel for**

**Chronically Stable Neural Interfaces**

Ruiqi Zhu,1 Zhengwei Hu,2 Zirui Lou,1 Fei Xie,3 Shuainan Zhao,4 Xuechen Jiao,3 Kenjiro Fukuda,5,6 Xiaodong Chen,7,8 Wenping Hu,9 Takao Someya,5,6,10 Hui-Ming Cheng,11,12 Xiaojian Li,2* Xiaomin Xu1*

1Institute of Materials Research, Shenzhen International Graduate School,

Tsinghua University, Shenzhen 518055, China

2CAS Key Laboratory of Brain Connectome and Manipulation, the Brain Cognition and Brain Disease Institute (BCBDI), Shenzhen Institute of Advanced Technology (SIAT), Chinese Academy of Sciences

Shenzhen-Hong Kong Institute of Brain Science-Shenzhen Fundamental Research Institutions, Shenzhen 518055, China

3National Synchrotron Radiation Laboratory,

University of Science and Technology of China (USTC), Hefei, China

4CAS Key Laboratory of Brain Connectome and Manipulation, Shenzhen-Hong Kong Institute of Brain Science, Shenzhen Institute of Advanced Technology,

Chinese Academy of Sciences, Shenzhen 518055, China

5Thin-Film Device Laboratory, RIKEN, Wako, Saitama, Japan

6RIKEN Center for Emergent Matter Science (CEMS), Wako, Saitama, Japan

7Innovative Center for Flexible Devices (iFLEX), Max Planck-NTU Joint Laboratory for Artificial Senses, School of Materials Science and Engineering, Nanyang Technological University (NTU), Singapore, Singapore

8Institute for Digital Molecular Analytics and Science (IDMxS),

Nanyang Technological University, Singapore, Singapore

9Key Laboratory of Organic Integrated Circuit, Ministry of Education & Tianjin Key Laboratory of Molecular Optoelectronic Sciences, Department of Chemistry, Institute of Molecular Aggregation Science, Tianjin University, Tianjin, China

10Department of Electrical Engineering and Information Systems,

The University of Tokyo, Tokyo, Japan

11Shenzhen Key Laboratory of Energy Materials for Carbon Neutrality, Shenzhen Institute of Advanced Technology, Chinese Academy of Sciences,

Shenzhen 518055, China

12Shenyang National Laboratory for Materials Science, Institute of Metal Research, Chinese Academy of Sciences, Shenyang 110016, China

*Correspondence should be sent to: [xu.xiaomin@sz.tsinghua.edu.cn](mailto:xu.xiaomin@sz.tsinghua.edu.cn) and [xj.li@siat.ac.cn](mailto:xj.li@siat.ac.cn)

**Table 1.** **Performance comparison between CHIP and documented conductive hydrogels.**

| **Type** | **Composition material** | **Conductivity**  **(S cm–1)** | **Impedance**  **in PBS**  **at 1 kHz (Ω)** | **Elongation at break**  **(%)** | **Young's modulus (MPa)** | **Ref.** |
| --- | --- | --- | --- | --- | --- | --- |
|
| Ionic conductive  hydrogels | PVA–H2SO4 | 8.2×10−2* | / | 290 | 3.5×10−2 | 1 |
| Hydroxypropyl cellulose/PVA | 3.5×10−2* | / | 320 | 0.38 | 2 |
| Oxidized alginate/gelatin | 3.5×10−2* | / | > 500 | 3.7×10−2 | 3 |
| Hydroxypropyl cellulose/PVA | 3.4×10−2* | / | 975 | 0.59 | 4 |
| PAA-AM/alginate/NaCl | 2.2×10−2 | / | 600 | 0.2 - 0.4 | 5 |
| Pure PEDOT:PSS  hydrogels | PEDOT:PSS | 670 | / | 20 | 57 | 6 |
| PEDOT:PSS | 101.4 | 103.9 | < 20 | < 15 | 7 |
| PEDOT:PSS | ~ 40 | / | > 35 | ~ 2 | 8 |
| PEDOT:PSS hydrogel with additives | PEDOT:PSS/metal halide | 547 | / | 25 | 10 - 20 | 9 |
| PEDOT:PSS/ionic liquid | 305 | / | 31 | / | 10 |
| PEDOT:PSS/ionic liquid | 47.4 ± 1.2 | / | 20 | 3.2×10−2 | 11 |
| PEDOT:PSS/DMSO | 28 | / | 20 | 1.1 | 12 |
| PEDOT:PSS/H2SO4 | 8.8 | / | 14.6 | 6.5×103 | 13 |
| PEDOT:PSS/DBSA | ~ 0.1 | / | > 50 | 1.0×10−3 | 14 |
| PEDOT:PSS in non-conductive hydrogel matrix | PEDOT:PSS/PAA | 247 | 27.8 | 610 | 2.5×10−2 | 15 |
| tannic acid/PVA/ PEDOT:PSS | ~ 20 - 140 | / | 188 | 6.4×10−1 | 16 |
| PEDOT:PSS/PANi/PAAm | 24 | 21.7 | 358 | 1.4×10−2 | 17 |
| PEDOT:PSS/PU | > 11 | ~ 80 | > 400 | < 1 | 18 |
| PEDOT:PSS/PVA | ~ 10 | 32.5 - 35.1 | 150 | 0.46 | 19 |
| PEDOT:PSS/SBMA/PEGDA | ~ 6 | 160 | ~ 290 | 7.3×10−3 | 20 |
| PEDOT:PSS/PAA | 0.23 | / | > 100 | 0.37 | 21 |
| Other conductive hydrogels | PAAm-alginate/silver flakes | 374 | / | 250 | < 1.0×10−2 | 22 |
| PPy/aramid nanofibers/PVA | ~ 80 | / | ~ 36 | ~ 9.4 | 23 |
| PPy/pHEMA | 13.59 | 8.4 | / | 0.44 | 24 |
| Alginate/carbon nanomaterials | 0.35 | / | 0.11 | / | 25 |
| PANi/phytic acid | 0.11 | / | / | / | 26 |
| cellulose/bentonite | 8.99×10−2 | / | 96 | 0.76 | 27 |
| poly(Cu-NIPAm) | 3.1×10−2 | / | ~ 100 | 90 | 28 |
| GO/PVA/PAA | > 2.6×10−2 | < 50 | > 200 | 0.29 | 29 |
| PPy/PAAm | 3.4×10−3 - 1.4×10−2 | / | 1500 - 2500 | 1.7×10−2 - 3.29×10−2 | 30 |
| phenylborate/gold nanoparticles | 1.0×10−2 | 680 | > 100 | / | 31 |
| CHIP | PPEL/PAAm-alginate | 2512 ± 118 | 15.6 | 124 ± 6 | 1.6 ± 0.05 | This work |

Note: PVA stands for polyvinyl alcohol, PANi stands for polyaniline, PAA stands for polyacrylamide, AM stands for acrylamide, DBSA stands for 4-dodecylbenzenesulfonic acid, DMSO stands for dimethyl sulfoxide, PAA stands for polyacrylic acid, PU stands for polyurethane, SBMA stands for 3-[dimethyl[2-(2-methylprop-2-enoyloxy)ethyl]azaniumyl] propane-1-sulfonate, PEGDA stands for polyethylene glycol diacrylate, PPy stands for polypyrrole, pHEMA stands for poly (2-hydroxyethyl methacrylate), GO stands for graphene oxide, NIPAm stands for N-isopropylacrylamide, CNT stands for carbon nanotube.

*Ionic conductivity. All other conductivity values are primarily attributed to electrical conductivity.

**Table 2. Comparison between CHlP-based ECoG and documented implantable neural interfaces containing hydrogels.**

| **Type** | **Conductive materials** | **Impedance at 1 kHz (**kΩ) | **Channel number** | **Channel linewidth (μm)** | **Subject** | **Implant position** | **Function** | **Implant duration (days)** | **Ref.** |
| --- | --- | --- | --- | --- | --- | --- | --- | --- | --- |
| Hydrogel as substrates | PAA-Ca2+/Pt | 32.2 ± 8.3 | 5 | / | cat | dorsal root ganglion | recording | acute | 32 |
| Au/Ti | ~ 6** | 6 | 100 | locusta migratoria | metathoracic ganglion | recording/  stimulation | acute | 33 |
| Hydrogel as coatings | PEDOT:PSS/NiCr | / | 2 | 17 | mouse | dorsal hippocampus | recording | 84 | 34 |
| PEDOT:PSS/MWCNT | / | 16 | / | rat | cortex | recording | acute | 35 |
| PEDOT:PSS/CNT | 3.41 ± 0.45** | 64 | 140 | rat | cortex | recording | acute | 36 |
| Hydrogel as electrodes | carbon nanomaterials | 105 | 8 | / | rat | heart and cortex | recording | acute | 25 |
| GO/PEDOT | 1.7 to 2.3** | 7 | 200 | rat | sciatic nerve | recording/  stimulation | 14 | 37 |
| PEDOT:PSS | 0.923** | 3 | 33 | mouse | brain slice & sciatic nerve | recording/  stimulation | acute | 6 |
| PEDOT:PSS | 50 - 150 | 9 | 30 | mouse | dorsal hippocampus | recording | 14 | 12 |
| PEDOT:PSS | ~ 12 | 17 | 60 | rat | heart and cortex | recording | 21 | 7 |
| PEDOT:PSS | ~ 20** | 32 | / | mouse | sciatic nerve | stimulation | 42 | 11 |
| PEDOT:PSS/Au | / | 64 | 100 | rabbit/  porcine | heart | recording | acute | 38 |
| CHIP | 8.9 ± 1.2 | 128 | 40 | mouse/  rabbit | cortex | recording/  stimulation | 550 | This work |

Note: MWCNT stands for multi-wall carbon nanotube.

**Impedance measured in PBS solution. All other impedance values represent tissue-electrode impedance.

**Table 3.** **Comparison between CHIP-based ECoG and other representative flexible, passive ECoG systems.**

| **Type** | **Conductive materials** | **Impedance at 1 kHz (kΩ)** | **Total thickness (μm）** | **Channel number** | **Subject** | **Function** | **Implant duration (days)** | **Ref.** |
| --- | --- | --- | --- | --- | --- | --- | --- | --- |
| Metal & Si | Pt | 5.2 ± 0.8** | 120 | 9 | mouse | recording | 6 weeks | 39 |
| Au | / | 2.5 | 30 | feline | recording | 4 weeks | 40 |
| Au | 212 ± 51 | / | 16 | rodent | recording | acute | 41 |
| Au/Ti | ~ 10** | 3 | 16 | rat | recording | 24 weeks | 42 |
| Ag/EGaln | / | 25 | 36 | rat | recording | acute | 43 |
| Si NM | / | ~ 30 | 4 | rat | recording | 33 days | 44 |
| Mo/P-doped Si | ~ 100** | 120 | 4 | mouse | recording | 3 weeks | 45 |
| Metal with coating | PEDOT:PSS/Au | 9.17 ± 9.14 | / | 32 | porcine | recording | acute | 46 |
| PEDOT:PSS/Au | 12.1 ± 1.2** | / | 32 | mouse | recording | 2 weeks | 47 |
| PEDOT:PSS/Au | / | 4 | 64 | rodent | recording | 10 days | 48 |
| PEDOT:PSS/Au/Pt | 10 - 100 | / | 240 | human | recording | acute | 49 |
| CNT/Au | 200** | / | 64 | rat | recording | acute | 50 |
| graphene/Au | 243.5 ± 5.9** | ~ 25 | 16 | rat | recording | 70 days | 51 |
| Nanomaterials | graphene | 105 | 250 | 8 | rat | recording | acute | 25 |
| Polymer | PPy | / | / | 4 | rat | recording | acute | 52 |
| PEDOT:PSS | ~ 12 | / | 16 | rat | recording | 3 weeks | 7 |
| PEDOT:PSS | 0.93** | / | 3 | mouse | recording | acute | 6 |
| PEDOT:PSS | / | 21 | 6 | rat | recording | acute | 53 |
| This work | CHIP | 8.9 ± 1.2 | 9 | 128 | rat/rabbit | recording/  stimulation | 550 days | This work |

Note: EGaln stands for gallium-indium alloy, Si NM stands for Si nanomembrane.

**Impedance measured in PBS solution. All other impedance values represent tissue-electrode impedance.

**References:**

1. Wang, K. et al. Chemically crosslinked hydrogel film leads to integrated flexible supercapacitors with superior performance. *Adv. Mater.* **27**, 7451–7457 (2015).

2. Gan, S. et al. Hydroxypropyl cellulose enhanced ionic conductive double-network hydrogels. *Int. J. Biol. Macromol.* **181**, 418–425 (2021).

3. Song, X. et al. A tunable self-healing ionic hydrogel with microscopic homogeneous conductivity as a cardiac patch for myocardial infarction repair. *Biomaterials* **273**, 120811 (2021).

4. Zhou, Y. et al. Highly stretchable, elastic, and ionic conductive hydrogel for artificial soft electronics. *Adv. Funct. Mater.* **29**, 1806220 (2019).

5. Huang, H. et al. Multiple stimuli responsive and identifiable Zwitterionic ionic conductive hydrogel for bionic electronic skin. *Adv. Electron. Mater.* **6**, 2000239 (2020).

6. Won, D. et al. Digital selective transformation and patterning of highly conductive hydrogel bioelectronics by laser-induced phase separation. *Sci. Adv.* **8**, eabo3209 (2022).

7. Won, D. et al. Laser-induced wet stability and adhesion of pure conducting polymer hydrogels. *Nat. Electron.* **7**, 475–486 (2024).

8. Lu, B. et al. Pure PEDOT:PSS hydrogels. *Nat. Commun.* **10**, 1043 (2019).

9. Wang, H. et al. Multifunctional filler‐free PEDOT:PSS hydrogels with ultrahigh electrical conductivity induced by lewis‐acid‐promoted ion exchange. *Adv. Mater.* **35**, 2302919 (2023).

10. Wang, J. et al. Ultra-high electrical conductivity in filler-free polymeric hydrogels toward thermoelectrics and electromagnetic interference shielding. *Adv. Mater.* **34**, 2109904 (2022).

11. Liu, Y. et al. Soft and elastic hydrogel-based microelectronics for localized low-voltage neuromodulation. *Nat. Biomed. Eng.* **3**, 58–68 (2019).

12. Yuk, H. et al. 3D printing of conducting polymers. *Nat. Commun.* **11**, 1604 (2020).

13. Yao, B. et al. Ultrahigh-conductivity polymer hydrogels with arbitrary structures. *Adv. Mater.* **29**, 1700974 (2017).

14. Zhang, S. et al. Room-temperature-formed PEDOT:PSS hydrogels enable injectable, soft, and healable organic bioelectronics. *Adv. Mater.* **32**, 1904752 (2020).

15. Chong, J. et al. Highly conductive tissue-like hydrogel interface through template-directed assembly. *Nat. Commun.* **14**, 2206 (2023).

16. Yang, S. et al. Stretchable surface electromyography electrode array patch for tendon location and muscle injury prevention. *Nat. Commun.* **14**, 6494 (2023).

17. Shin, Y. et al. Low-impedance tissue-device interface using homogeneously conductive hydrogels chemically bonded to stretchable bioelectronics. *Sci. Adv.* **10**, eadi7724 (2024).

18. Zhou, T. et al. 3D printable high-performance conducting polymer hydrogel for all-hydrogel bioelectronic interfaces. *Nat. Mater.* **22**, 895–902 (2023).

19. Li, G. et al. Highly conducting and stretchable double-network hydrogel for soft bioelectronics. *Adv. Mater.* **34**, 2200261 (2022).

20. Yang, M. et al. Robust neural interfaces with photopatternable, bioadhesive, and highly conductive hydrogels for stable chronic neuromodulation. *ACS Nano* **17**, 885–895 (2023).

21. Feig, V.-R., Tran, H., Lee, M. & Bao, Z. Mechanically tunable conductive interpenetrating network hydrogels that mimic the elastic moduli of biological tissue. *Nat. Commun.* **9**, 2740 (2018).

22. Ohm, Y. et al. An electrically conductive silver–polyacrylamide–alginate hydrogel composite for soft electronics. *Nat. Electron.* **4**, 185–192 (2021).

23. He, H. et al. Hybrid assembly of polymeric nanofiber network for robust and electronically conductive hydrogels. *Nat. Commun.* **14**, 759 (2023).

24. Wang, C., Rubakhin, S.S., Enright, M.J., Sweedler, J.V. & Nuzzo, R.G. 3D particle free printing of biocompatible conductive hydrogel platforms for neuron growth and electrophysiological recording. *Adv. Funct. Mater.* **31**, 2010246 (2021).

25. Tringides, C.-M. et al. Viscoelastic surface electrode arrays to interface with viscoelastic tissues. *Na.t Nanotechnol.* **16**, 1019–1029 (2021).

26. Pan, L. et al. Hierarchical nanostructured conducting polymer hydrogel with high electrochemical activity. *Proc. Natl. Acad. Sci. U. S. A.* **109**, 9287–9292 (2012).

27. Wang, S. et al. Strong, tough, ionic conductive, and freezing-tolerant all-natural hydrogel enabled by cellulose-bentonite coordination interactions. *Nat. Commun.* **13**, 3408 (2022).

28. Xia, X. et al. Intrinsically electron conductive, antibacterial, and anti‐swelling hydrogels as implantable sensors for bioelectronics. *Adv. Funct. Mater.* **32**, 2208024 (2022).

29. Deng, J. et al. Electrical bioadhesive interface for bioelectronics. *Nat. Mater.* **20**, 229–236 (2021).

30. Liang, Q. et al. Electron conductive and transparent hydrogels for recording brain neural signals and neuromodulation. *Adv. Mater.* **35**, 2211159 (2023).

31. Jin, S. et al. Injectable tissue prosthesis for instantaneous closed-loop rehabilitation. *Nature* **623**, 58–65 (2023).

32. Huang, W.-C. et al. Ultracompliant hydrogel‐based neural interfaces fabricated by aqueous‐phase microtransfer printing. *Adv. Funct. Mater.* **28**, 1801059 (2018).

33. Hiendlmeier, L. et al. 4D‐Printed Soft and Stretchable Self‐Folding Cuff Electrodes for Small‐Nerve Interfacing. *Adv. Mater.* **35**, 2210206 (2023).

34. Yan, M. et al. Conducting Polymer-Hydrogel Interpenetrating Networks for Improving the Electrode-Neural Interface. *ACS Appl. Mater. Interfaces* **15**, 41310–41323 (2023).

35. Wang, K. et al. Electrodeposition of alginate with PEDOT/PSS coated MWCNTs to make an interpenetrating conducting hydrogel for neural interface. *Compos. Interfaces* **26**, 27–40 (2018).

36. Castagnola, E. et al. Biologically compatible neural interface to safely couple nanocoated electrodes to the surface of the brain. *ACS Nano* **7**, 3887–3895 (2013).

37. Lei, W.-L. et al. All biodisintegratable hydrogel biohybrid neural interfaces with synergistic performances of microelectrode array technologies, tissue scaffolding, and cell therapy. *Adv. Funct. Mater.* **34**, 2307365 (2023).

38. Liu, J. et al. Intrinsically stretchable electrode array enabled in vivo electrophysiological mapping of atrial fibrillation at cellular resolution. *Proc. Natl. Acad. Sci. U. S. A.* **117**, 14769–14778 (2020).

39. Minev, I.-R. et al. Electronic dura mater for long-term multimodal neural interfaces. *Science* **347**, 159–163 (2015).

40. Kim, D.-H. et al. Dissolvable films of silk fibroin for ultrathin conformal bio-integrated electronics. *Nat. Mater.* **9**, 511–517 (2010).

41. Konerding, W.-S., Froriep, U.P., Kral, A. & Baumhoff, P. New thin-film surface electrode array enables brain mapping with high spatial acuity in rodents. *Sci. Rep.* **8**, 3825 (2018).

42. Lee, S. et al. A shape-morphing cortex-adhesive sensor for closed-loop transcranial ultrasound neurostimulation. *Nat. Electron.* **7**, 800–814 (2024).

43. Zhuang, Q.-N. et al. Wafer-patterned, permeable, and stretchable liquid metal microelectrodes for implantable bioelectronics with chronic biocompatibility. *Sci. Adv.* **9**, eadg8602 (2023).

44. Yu, K.-J. et al. Bioresorbable silicon electronics for transient spatiotemporal mapping of electrical activity from the cerebral cortex. *Nat. Mater.* **15**, 782–791 (2016).

45. Cho, M. et al. Fully bioresorbable hybrid opto-electronic neural implant system for simultaneous electrophysiological recording and optogenetic stimulation. *Nat. Commun.* **15**, 2000 (2024).

46. Coles, L. et al. Origami-inspired soft fluidic actuation for minimally invasive large-area electrocorticography. *Nat. Commun.* **15**, 6290 (2024).

47. Qiang, Y. et al. Transparent arrays of bilayer-nanomesh microelectrodes for simultaneous electrophysiology and two-photon imaging in the brain. *Sci. Adv.* **4**, eaat0626 (2018).

48. Khodagholy, D. et al. NeuroGrid: recording action potentials from the surface of the brain. *Nat. Neurosci.* **18**, 310–315 (2015).

49. Khodagholy, D. et al. Organic electronics for high-resolution electrocorticography of the human brain. *Sci. Adv.* **2**, e1601027 (2016).

50. Wei, S. et al. Shape-changing electrode array for minimally invasive large-scale intracranial brain activity mapping. *Nat. Commun.* **15**, 715 (2024).

51. Park, D.-W. et al. Graphene-based carbon-layered electrode array technology for neural imaging and optogenetic applications. *Nat. Commun.* **5**, 5258 (2014).

52. Qi, D. et al. Highly stretchable, compliant, polymeric microelectrode arrays for in vivo electrophysiological interfacing. *Adv. Mater.* **29**, 1702800 (2017).

53. Hu, Z. et al. Flexible neural interface from non‐transient silk fibroin with outstanding conformality, biocompatibility, and bioelectric conductivity. *Adv. Mater.* **36**, 2410007 (2024).
